# Supplementary material
Source: publisher figshare collection journal article supplement (https://sage.figshare.com/ndownloader/files/12398921)
Supplement: Supplementary file 1 [file 12398921]

## Sheet: tableS5
Table S5. Summary of matching and improvement in balance for each four matching runs. All variables were entered together, and overall distance between pre matching and matched data is given, in addition to a variable by variable breakdown.
				Pre matching data				Matched data		Comparison of pre and post mathcing
Statistical comparison	co variate	IBAs < 10 km mean	IBAs > 100 km mean	IBAs > 100 km SD	Difference in means	IBAs < 10 km mean	IBAs > 100 km mean	IBAs > 100 km SD	Difference in means	% balance improvement
Forest loss	Overall distance	0.1648	0.1392	0.0501	0.0256	0.1594	0.1538	0.0557	0.0056	78.2214
Forest loss	surrounding agriculure	0.3148	0.2583	0.3078	0.0566	0.3053	0.2586	0.3083	0.0467	17.3839
Forest loss	ruggedness	0.0053	0.0043	0.007	0.001	0.0053	0.0055	0.0078	-0.0003	74.0212
Forest loss	human population	240.19	90.999	380.267	149.191	153.502	89.0334	281.189	64.4686	56.7878
Forest loss	protected area coverage	0.5515	0.6807	0.4663	-0.1291	0.5685	0.5583	0.4971	0.0102	92.082
Forest loss	Initial forest loss	0.0079	0.0097	0.0238	-0.0017	0.0079	0.0081	0.0161	-0.0002	87.2815
Forest loss	RegionAfrica	0.25	0.0423	0.2013	0.2077	0.2454	0.2454	0.4308	0	100
Forest loss	RegionAsia	0.3302	0.1524	0.3594	0.1778	0.3497	0.3497	0.4774	0	100
Forest loss	RegionAustralasia	0	0.0697	0.2546	-0.0697	0	0	0	0	100
Forest loss	RegionCaribbean	0.0401	0.0363	0.187	0.0038	0.0429	0.0429	0.2029	0	100
Forest loss	RegionCentralAmerica	0.0515	0.0019	0.0437	0.0496	0.0123	0.0123	0.1102	0	100
Forest loss	RegionCentralAsia	0.0095	0.0515	0.2211	-0.042	0.0102	0.0102	0.1007	0	100
Forest loss	RegionEurope	0.2004	0.5102	0.5	-0.3098	0.2147	0.2147	0.4111	0	100
Forest loss	RegionMiddleEast	0.0076	0.0143	0.1188	-0.0067	0.0061	0.0061	0.0782	0	100
Forest loss	RegionNorthAmerica	0	0.0448	0.207	-0.0448	0	0	0	0	100
Forest loss	RegionOceania	0.0019	0.0038	0.0617	-0.0019	0.002	0.002	0.0452	0	100
Forest loss	RegionSouthAmerica	0.1088	0.0728	0.2599	0.0359	0.1166	0.1166	0.3212	0	100
State change	Overall distance	0.7431	0.3886	0.181	0.3546	0.5903	0.4967	0.1938	0.0936	73.5963
State change	surrounding agriculure	0.2053	0.2582	0.3124	-0.0528	0.0482	0.0003	0.001	0.0479	9.4042
State change	ruggedness	0.0019	0.0007	0.0016	0.0012	0.0009	0.0005	0.0013	0.0004	65.3169
State change	human population	174.288	18.6496	41.7657	155.639	244.954	28.1524	71.6466	216.802	-39.2982
State change	protected area coverage	0.8644	0.6923	0.4676	0.1721	0.8	0.9	0.3162	-0.1	41.8939
State change	initial state	2.1017	2.1282	0.9228	-0.0265	2.4	2.4	0.6992	0	100
State change	RegionAfrica	0.9322	0.2564	0.4424	0.6758	1	1	0	0	100
State change	RegionAsia	0.0678	0.1026	0.3074	-0.0348	0	0	0	0	100
State change	RegionCaribbean	0	0.0256	0.1601	-0.0256	0	0	0	0	100
State change	RegionCentralAsia	0	0.4359	0.5024	-0.4359	0	0	0	0	100
State change	RegionEurope	0	0.1282	0.3387	-0.1282	0	0	0	0	100
State change	RegionMiddleEast	0	0.0513	0.2235	-0.0513	0	0	0	0	100
Pressure change	Overall distance	0.4318	0.3209	0.1271	0.1109	0.3926	0.3447	0.1351	0.0479	56.8085
Pressure change	surrounding agriculure	0.2571	0.2199	0.3187	0.0372	0.1909	0.1601	0.2715	0.0308	17.2266
Pressure change	ruggedness	0.0041	0.0046	0.0087	-0.0006	0.0043	0.0041	0.0064	0.0001	79.8888
Pressure change	human population	536.029	58.6951	202.938	477.334	159.57	81.8518	278.289	77.7177	83.7184
Pressure change	protected area coverage	0.7705	0.6296	0.484	0.1409	0.7333	0.75	0.4367	-0.0167	88.1681
Pressure change	initial pressure	1.418	1.5787	0.9466	-0.1607	1.5667	1.6833	0.9112	-0.1167	27.3878
Pressure change	RegionAfrica	0.582	0.162	0.3693	0.4199	0.5833	0.5833	0.4972	0	100
Pressure change	RegionAsia	0.3361	0.0741	0.2625	0.262	0.2667	0.2667	0.4459	0	100
Pressure change	RegionAustralasia	0	0.1111	0.315	-0.1111	0	0	0	0	100
Pressure change	RegionCaribbean	0.0082	0.0278	0.1647	-0.0196	0.0167	0.0167	0.1291	0	100
Pressure change	RegionCentralAsia	0.0164	0.1111	0.315	-0.0947	0.0333	0.0333	0.181	0	100
Pressure change	RegionEurope	0.0246	0.25	0.434	-0.2254	0.05	0.05	0.2198	0	100
Pressure change	RegionMiddleEast	0.0328	0.0833	0.277	-0.0505	0.05	0.05	0.2198	0	100
Pressure change	RegionNorthAmerica	0	0.0093	0.096	-0.0093	0	0	0	0	100
Pressure change	RegionOceania	0	0.1574	0.365	-0.1574	0	0	0	0	100
Pressure change	RegionSouthAmerica	0	0.0139	0.1173	-0.0139	0	0	0	0	100
Response change	Overall distance	0.3191	0.2708	0.0898	0.0483	0.3163	0.2878	0.0654	0.0285	41.0561
Response change	surrounding agriculure	0.257	0.2711	0.3323	-0.0141	0.2052	0.1259	0.2337	0.0793	-461.785
Response change	ruggedness	0.0042	0.0044	0.0077	-0.0002	0.0048	0.0047	0.0068	0	74.4587
Response change	human population	499.622	77.4066	281.324	422.215	164.77	31.9921	60.1236	132.778	68.5521
Response change	protected area coverage	0.7239	0.7418	0.4383	-0.018	0.6667	0.7121	0.4562	-0.0455	-153.099
Response change	initial response	0.7761	0.5816	0.8522	0.1945	0.8182	0.8485	1.0265	-0.0303	84.4214
Response change	RegionAfrica	0.5672	0.1039	0.3055	0.4633	0.5152	0.5152	0.5036	0	100
Response change	RegionAsia	0.306	0.0504	0.2192	0.2555	0.2424	0.2424	0.4318	0	100
Response change	RegionAustralasia	0	0.0712	0.2576	-0.0712	0	0	0	0	100
Response change	RegionCaribbean	0.0075	0.0178	0.1324	-0.0103	0.0152	0.0152	0.1231	0	100
Response change	RegionCentralAsia	0.0149	0.0801	0.2719	-0.0652	0.0303	0.0303	0.1727	0	100
Response change	RegionEurope	0.0224	0.4777	0.5002	-0.4554	0.0455	0.0455	0.2099	0	100
Response change	RegionMiddleEast	0.0821	0.0564	0.231	0.0257	0.1515	0.1515	0.3613	0	100
Response change	RegionNorthAmerica	0	0.0208	0.1428	-0.0208	0	0	0	0	100
Response change	RegionOceania	0	0.1128	0.3168	-0.1128	0	0	0	0	100
Response change	RegionSouthAmerica	0	0.0089	0.0941	-0.0089	0	0	0	0	100
